# Supplementary figures and images for: The Xanthine Oxidase Inhibitor Febuxostat Suppresses Adipogenesis and Activates Nrf2
Source: MDPI journal article supplement (doi:10.3390/antiox12010133), 2023-01-05

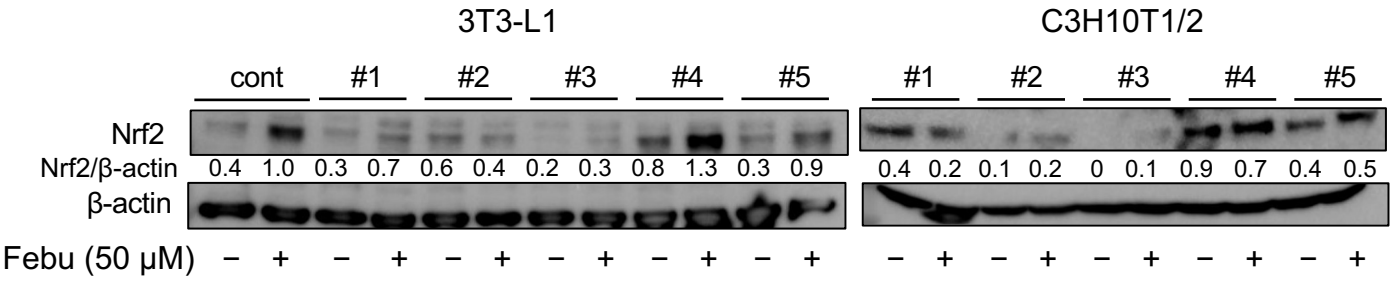

Figure S1

Supplement: s1 [file s1]
